# Supplementary material for: Cerebrospinal Fluid Concentrations of Meropenem and Vancomycin in Ventriculitis Patients Obtained by TDM-Guided Continuous Infusion
Source: MDPI journal article supplement (doi:10.3390/antibiotics10111421), 2021-11-20
Supplement: s1 [file s1]

## Supplemental Materials

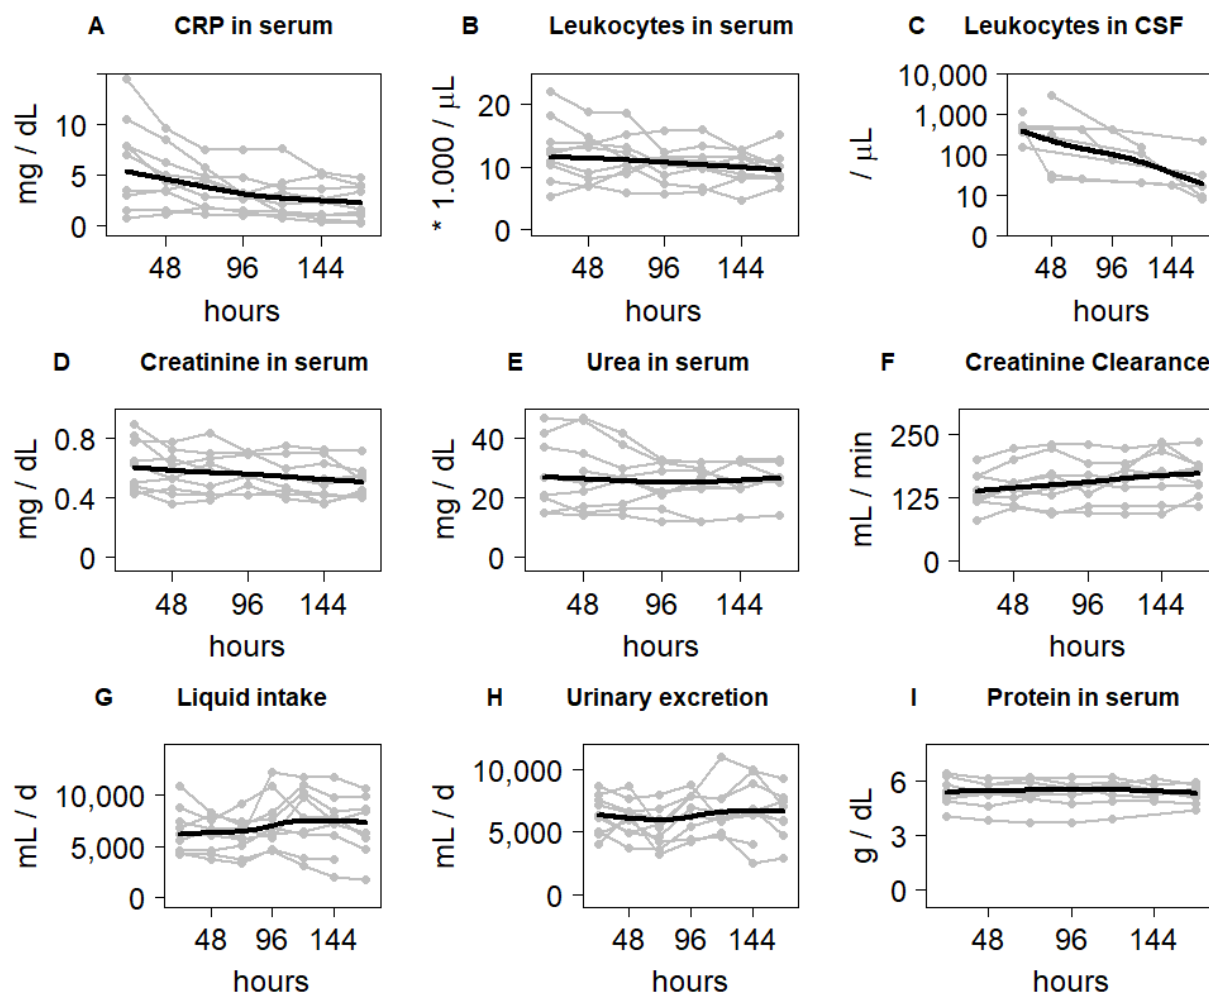

**Figure S1.** Parameters of inflammation and possible confounding variables of drug concentrations. **A-C** C-reactive protein, together with leukocyte count in both, serum and CSF, decreased during antibiotic therapy. **D-F** All patients presented with normal renal retention parameters throughout the treatment period. Noteworthy, no renal impairment could be detected despite high-dose vancomycin therapy. **G-H** Fluid intake and urinary excretion balanced at 6 L/d and remained unchanged during therapy. **I** No difference in whole protein concentrations in serum was observed over the course of treatment.

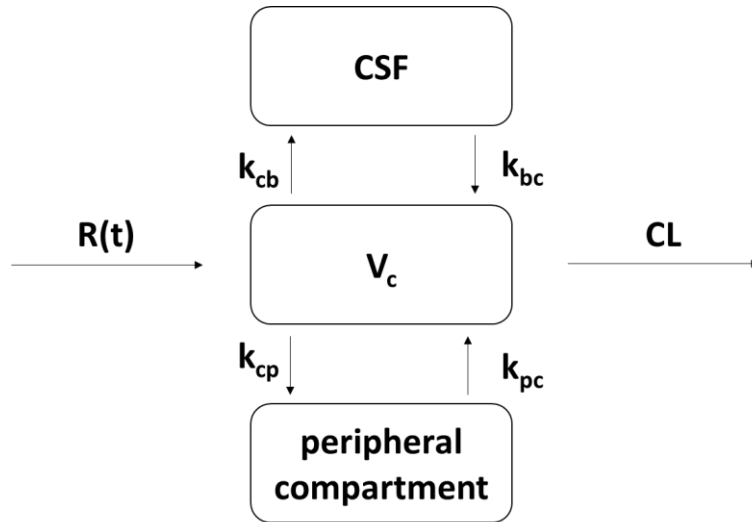

**Figure S2.** Pharmacokinetic model.  $V_c$  in L represents the volume of the central compartment.  $R(t)$  infusion rate,  $CL$  clearance,  $k_{cp}$ ,  $k_{pc}$ ,  $k_{bc}$  and  $k_{cb}$  in  $h^{-1}$  represent first-order transfer constants connecting the various compartments.  $k_{bc}$  describes the transition from CSF to the central compartment, while accordingly  $k_{cb}$  stands for the transition from the central compartment to the CSF,  $k_{pc}$  for the transition from the peripheral compartment to the central compartment and  $k_{cp}$  for the transition from the central compartment to the peripheral compartment.
